# Supplementary material for: Nitrogen-doped porous carbon with complicated architecture and superior K+ storage performance
Source: Royal Society of Chemistry journal article supplement (doi:10.1039/d0se01575j), 2020-11-24
Supplement: d0se01575j1.pdf [file d0se01575j1.pdf]

Electronic Supplementary Information for

## **Nitrogen-doped Porous Carbon with Complicated Architecture and Superior K<sup>+</sup> Storage Performance**

*Yongsheng Zhou*\*<sup>[a,b]</sup>, *Yingchun Zhu*<sup>[b,e]</sup>, *Bingshe Xu*<sup>[c]</sup>, and *Xueji Zhang*\*<sup>[d]</sup>

[a] College of Chemistry and Materials Engineering, Anhui Science and Technology University, Bengbu,  
233030, P. R. China

[b] Key Laboratory of Inorganic Coating Materials CAS, Shanghai Institute of Ceramics, Chinese Academy of  
Sciences, Shanghai, 200050, P. R. China

[c] Key Laboratory of Interface Science and Engineering in Advanced Materials, Ministry of Education,  
Taiyuan University of Technology, Taiyuan, 030024, P. R. China

[d] School of Biomedical Engineering, Shenzhen University Health Science Center, Shenzhen, Guangdong  
518060, P. R. China

[e] Center of Materials Science and Optoelectronics Engineering, University of Chinese Academy of  
Sciences, Beijing 100049, P. R. China

E-mail: yszhou1981@gmail.com; zhangxueji@szu.edu.cn

## Experimental section

### Synthesis of N-doped carbon hollow turbostratic tube (CHTT-N) and carbon hollow turbostratic tube (CHTT)

The preparation process of nitrogen-doped nanofiber hybrid membranes is illustrated in Figure 2A. The polyacrylonitrile (PAN) nanofiber membrane was first prepared through a facile single-nozzle electrospinning technique using a commercial electrospinning system (UCALERY Beijing Co., Ltd, China). Typically, 0.5 g of PAN and 0.25 g of urea were dissolved in 4.25 g of dimethylformamide (DMF) at room temperature under magnetic stirring to form a polymer solution after stirring for 3 h to ensure complete solubility. A 4.0 g amount of  $\text{Ni}(\text{Ac})_2$  (Ac = acetate) and magnesium nitrate hexahydrate was added to the mixture, and stirring was continued until the polymer solution became clear and then loaded into a 5 mL plastic syringe. The electrospinning process was carried out at a high voltage of 20 kV at a feeding rate of 0.1 mm  $\text{min}^{-1}$  through a stainless-steel needle, which had an inner diameter of 0.5 mm. After evaporation of the solvents from the jet stream, the composite nanofibers of  $\text{PAN}/\text{Ni}(\text{Ac})_2/\text{Mg}(\text{NO}_3)_2$  were produced and the resulting nonwoven fiber mat was collected. All electrospinning experiments were performed at room temperature. The obtained nonwoven fiber mat was stabilized in air at 275 °C for 2 h with a heating rate of 1 °C/min.

Then, the preoxidized process of the generated  $\text{PAN}/\text{Ni}(\text{Ac})_2/\text{Mg}(\text{NO}_3)_2$  nanofiber membrane was generated at 180 °C in air atmosphere for 1 h with a heating rate of 1 °C  $\text{min}^{-1}$ . CHTT-N was grown on the resulting product at 1,000 °C under a gas mixture ( $\text{H}_2$ : Ar:  $\text{NH}_3$ =20: 300: 100 sccm) flow in an induction furnace. The CHTT-N was harvested after the acidic etching of the sample

by a HCl solution to remove MgO. The CHTT material was prepared in a way similar to that for the CHTT material, but NH<sub>3</sub> was not added to the reaction.

In addition, pure CNF was obtained by a direct preoxidization and carbonization processes of the electrospun PAN nanofiber membrane.

### **Characterization of materials**

Scanning electron microscope (SEM) images were obtained using an S-4800 field emission scanning electron microscope (Hitachi, Japan) operating at 10 kV. The transmission electron microscope (TEM) images were obtained using a FEI Titan G<sub>2</sub> 60-300 operating at 80 kV. X-ray powder diffraction (XRD) pattern of the sample was recorded using a D/max-3C diffractometer equipped with Cu-K $\alpha$  X-ray source. Raman spectra were recorded with a Renishaw RM-1000 Micro Raman Spectrometer. Investigations of chemical compositions were performed using X-ray photoelectron spectroscopy (XPS, Physical Electronics PHI 5600). N<sub>2</sub> sorption analysis was conducted on an ASAP2020 accelerated surface area and porosimetry instrument (Micromeritics), equipped with automated surface area, at 77 K using BarrettEmmettTeller (BET) calculations for the surface area. The pore size distribution (PSD) plot was recorded from the adsorption branch of the isotherm based on the Barrett–Joyner–Halenda (BJH) method.

### **Electrochemical measurements**

The electrochemical performance of as-prepared composites was carried out via CR2025 coin-type cells. The working electrodes were consisted with 80 wt% active materials, 10 wt% ketjen black, and 10 wt% carboxymethyl cellulose, which were mixed with appropriate de-ionized water, pasted on Ni foam, and dried at 80 °C under vacuum for 12 h. The loading density, diameter, and thickness of the prepared electrodes were ~1mg cm<sup>-2</sup>, ~12 mm, and ~65 to 85  $\mu$ m, respectively.

For PIBs, the counter electrode was potassium foil, and the electrolyte was 1 M KPF<sub>6</sub> in EC: propylene carbonate (PC) (1: 1 in volume). A glass fiber membrane (Whatman, GF/D) was used as the separator for PIBs. The galvanostatic discharge/charge test was performed on a battery tester (Land 2001A system) between 0.05 and 2.8 V under various current densities from 0.1 to 20 A g<sup>-1</sup>. Cyclic voltammetry (CV) was measured on a CHI660C electrochemical workstation from 0.2 to 2.0 mV s<sup>-1</sup>.

The CHTT-N//CHTT-N PIHC devices were assembled by employing the prepotassiation CHTT-N anode and raw CHTT-N cathode with a mass ratio ranging from 1:0.5 to 1:2. The mass loading of active material in the anode is ~2 mg cm<sup>-2</sup>. During the prepotassiation process, the half-cell was charged–discharged for six cycles at 0.05 A g<sup>-1</sup>. The electrochemical performance tests including galvanostatic charge–discharge and CV were conducted using a Gamry Interface 1000 electrochemical workstation. The power density (P, W kg<sup>-1</sup>) and energy density (E, Wh kg<sup>-1</sup>) of the CHTT-N//CHTT-N PIHC devices were calculated based on the total mass of anode and cathode electrodes using the following equations:

$$P = \frac{\Delta V \times I}{2m} \times 1000 \quad (1)$$

$$E = \frac{P \times I}{3600} \quad (2)$$

Where  $\Delta V$  (V) is the discharge voltage excluding the IR drop,  $I$  (A) is the discharge current,  $m$  (g) is the total mass of active materials, including anode and cathode, and  $t$  (s) is the discharge time, respectively.

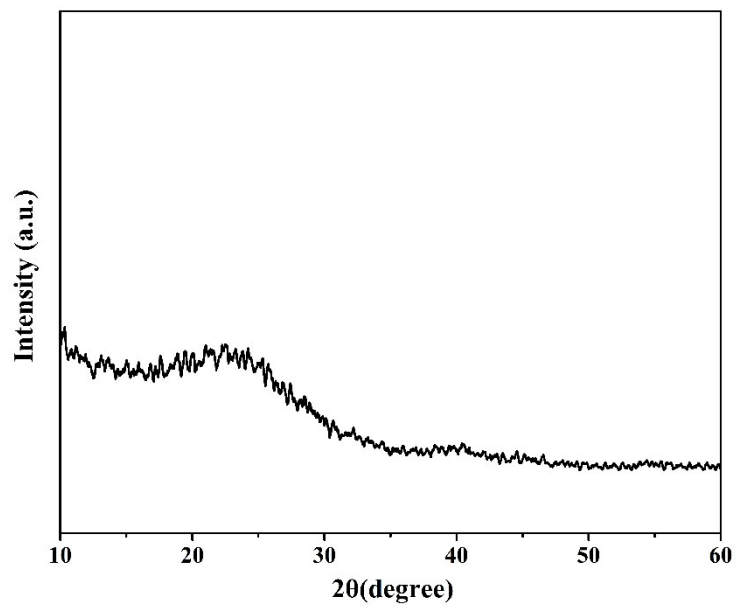

**Figure S1.** XRD pattern of the CHTT-N.

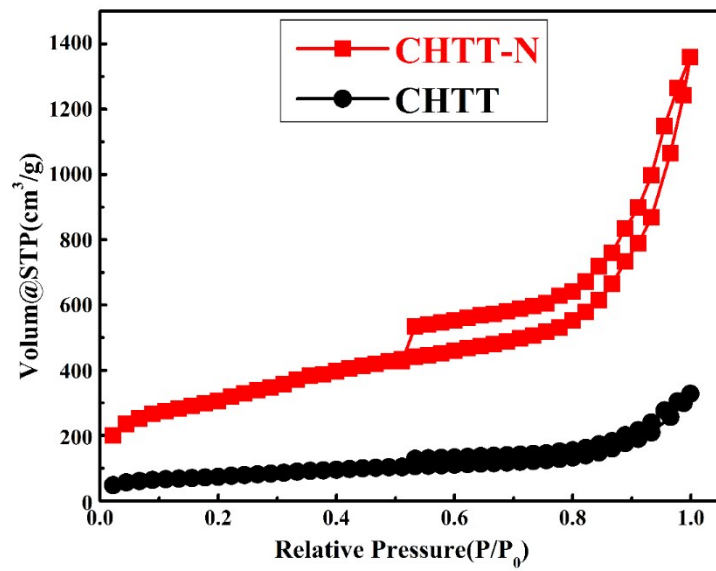

**Figure S2.** N<sub>2</sub> adsorption–desorption isotherms.

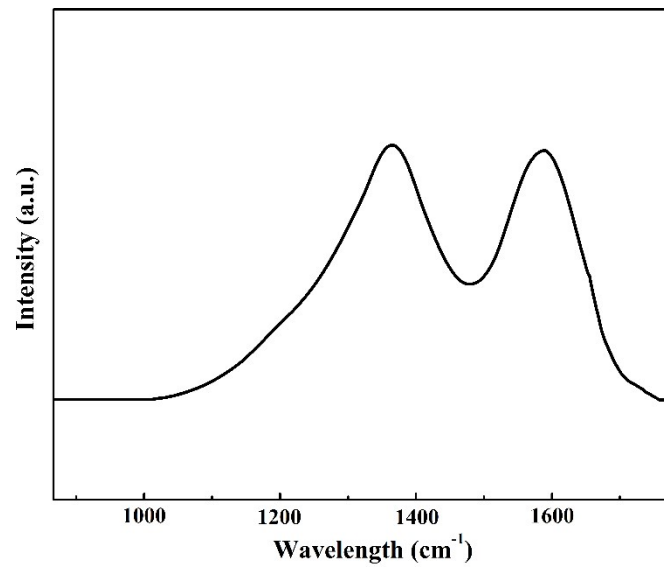

**Figure S3.** Raman spectra of CHTT-N.

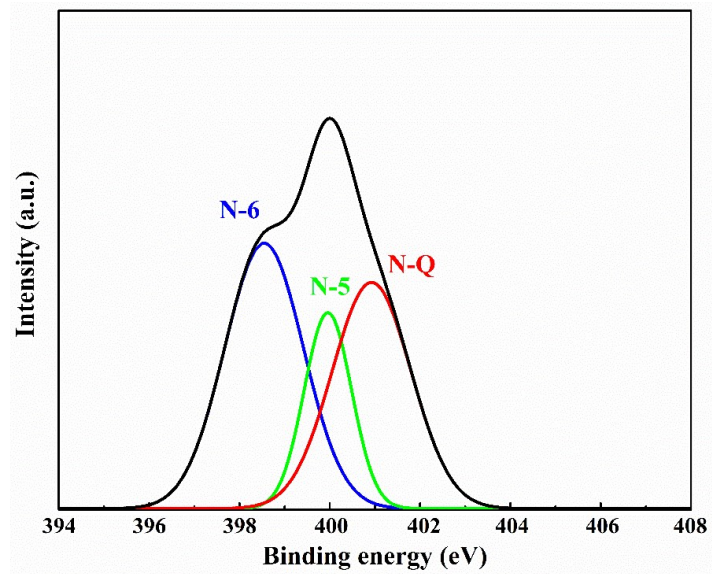

**Figure S4.** The fine-scanned N 1s spectra of CHTT-N.



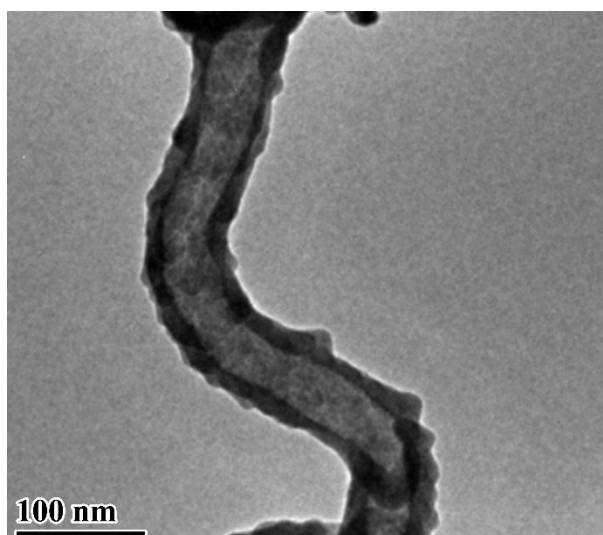

**Figure S5.** High-magnification TEM image of CHTT-N after 200th cycles.

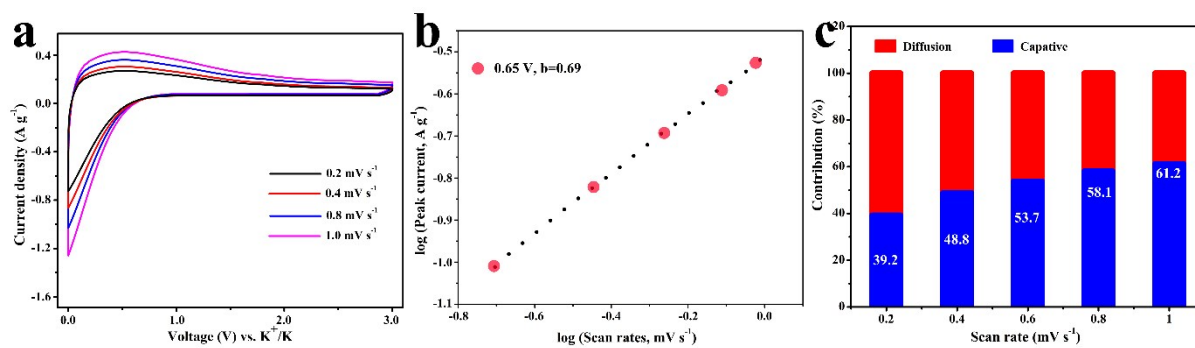

**Figure S6.** (a) CV curves at different scan rates from 0.2 to 1.0 mV s<sup>-1</sup>. (b) Determination of the b-value according to the relationship between the peak current and the scan rate. (c) Normalized contribution proportions of capacitance and diffusion at different scan rates.

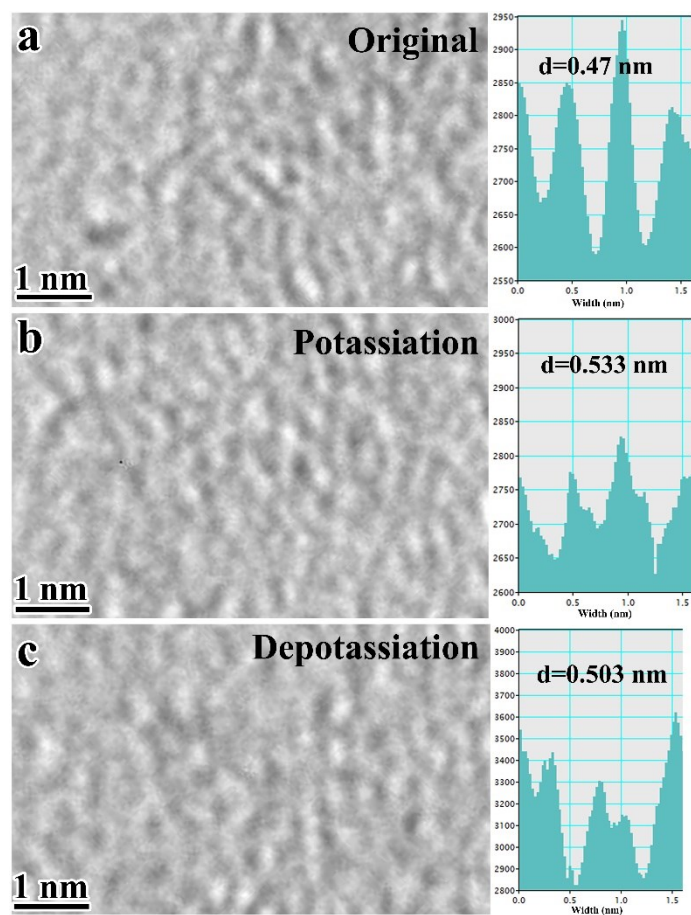

**Figure S7.** HRTEM images and corresponding interlayer spacing of the (a) original, (b) potassiated and (c) depotassiated CHTT-N.

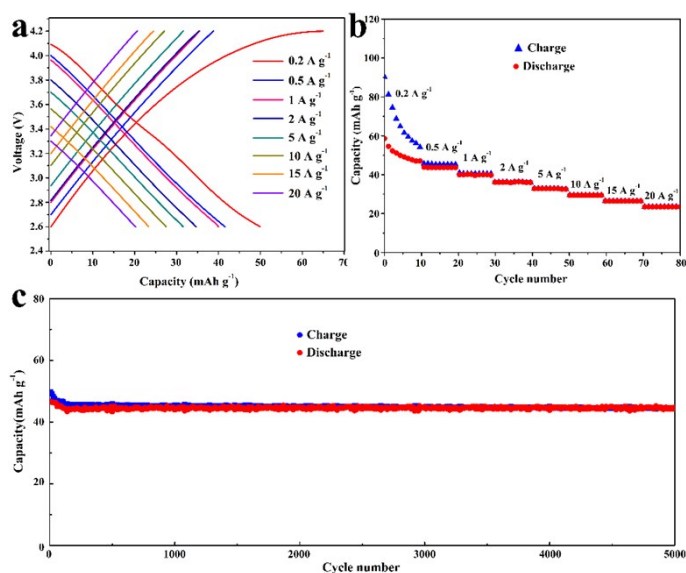

**Figure S8.** Electrochemical properties of the CHTT-N tested as KIB cathode. (a) charge-discharge curves, and (b) rate capability profiles at different current densities from 0.2 to 20 A g<sup>-1</sup>. (c) cycle performance at current density of 2 A g<sup>-1</sup> for 5000 cycles.

The electrochemical performance of CHTT-N cathodes was evaluated by using galvanostatic charge-discharge operated at high potentials of 2.5-4.2 V vs. K/K<sup>+</sup>. As shown in Figure S6a, the charge-discharge curves of the CHTT-N materials at different current densities are highly symmetrical and quasitriangular without obvious redox peaks, which indicated that CHTT-N electrode possesses a typical capacitive behavior as desirable capacitor-type cathode material. Moreover, the CHTT-N exhibit high capacity and good rate capability at high currents (Figure S6b). The charge capacity of CHTT-N is 53.6 mAh g<sup>-1</sup> at current density of 0.2 A g<sup>-1</sup>. Even at a very high current density of 20 A g<sup>-1</sup>, the CHTT-N cathode can still be charged to 23.5 mAh g<sup>-1</sup>. The CHTT-N cathode also shows a stable cycling performance of 44 mAh g<sup>-1</sup> after 5000 cycles under the current density of 2 A g<sup>-1</sup>, showing its excellent cycling stability as cathode for high-performance PIHCs.

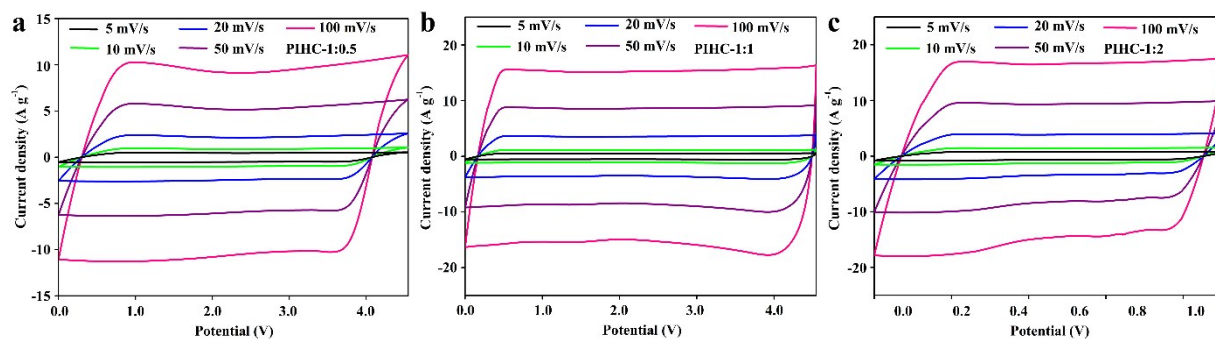

**Figure S9.** Typical CV curves of the CHTT-N//CHTT-N PIHCs at different scan rates of the 5-100  $\text{mV s}^{-1}$  for the voltage window of 0-4.5 V.

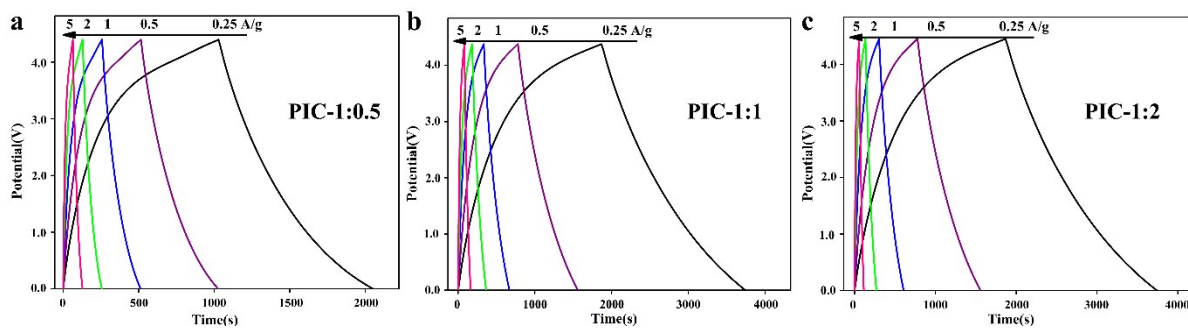

**Figure S10.** Typical charge-discharge curves of the CHTT-N//CHTT-N PIHCs at different current densities of the 0.25-5 A g<sup>-1</sup> for the voltage window of 0-4.5 V.

**Table S1** Comparison of the performances of CHTT-N and other high-performance carbon anodes from literatures.

| Materials                                 | Current density (mA g <sup>-1</sup> ) | Capacity (mAh g <sup>-1</sup> ) | Cycling Number (current density, mA g <sup>-1</sup> ) | Ref. |
|-------------------------------------------|---------------------------------------|---------------------------------|-------------------------------------------------------|------|
| NCNF-650                                  | 25                                    | 248                             | 1000 (500)                                            | 1    |
| NOHPHC                                    | 25                                    | 365                             | 100 (50)                                              | 2    |
| MoS <sub>2</sub> @SnO <sub>2</sub> @C     | 50                                    | 597                             | 25 (50)                                               | 3    |
| MoSe <sub>2</sub> /N-Doped Carbon         | 100                                   | 300                             | 300 (100)                                             | 4    |
| PCM                                       | 50                                    | 230                             | 200 (500)                                             | 5    |
| CNS                                       | 100                                   | 252                             | 1300 (2000)                                           | 6    |
| S/N@C                                     | 50                                    | 320                             | 900(2000)                                             | 7    |
| V <sub>2</sub> O <sub>5</sub> @CNT Sponge | 10                                    | 145                             | 50(25)                                                | 8    |
| Yolk-Shell FeS <sub>2</sub> @C            | 1000                                  | 360                             | 20(300)                                               | 9    |
| Our work                                  | 100                                   | 397                             | 3000(5000)                                            |      |

## References

1. Y. Xu, C. Zhang, M. Zhou, Q. Fu, C. Zhao, M. Wu, Y. Lei, *Nat. Commun.* **2018**, 9, 1720.
2. J. Yang, Z. Ju, Y. Jiang, Z. Xing, B. Xi, J. Feng, S. Xiong, *Adv. Mater.* **2018**, 30, 1700104.
3. Chen, Z.; Yin, D.; Zhang, M., *Small* **2018**, 14, 1703818.
4. Ge, J.; Fan, L.; Wang, J.; Zhang, Q.; Liu, Z.; Zhang, E.; Liu, Q.; Yu, X.; Lu, B., *Adv. Energy*

- Mater.* **2018**, 8,1801477.
5. M. Chen, W. Wang, X. Liang, S. Gong, J. Liu, Q. Wang, S. Guo, H. Yang, *Adv. Energy Mater.* **2018**, 8, 1800171.
  6. J. Chen, B. Yang, H. Hou, H. Li, L. Liu, L. Zhang, X. Yan, *Adv. Energy Mater.* **2019**, 9, 1803894.
  7. A. Mahmood, S. Li, Z. Ali, H. Tabassum, B. Zhu, Z. Liang, W. Meng, W. Aftab, W. Guo, H. Zhang, et al., *Adv. Mater.* **2018**, 30, 1805430.
  8. Ye, F.; Lu, D.; Gui, X.; Wang, T.; Zhuang, X.; Luo, W.; Huang, Y., *J. Materiomics* **2018**, 2352-8478.
  9. Zhao, Y.; Zhu, J.; Ong, S. J. H.; Yao, Q.; Shi, X.; Hou, K.; Xu, Z. J.; Guan, L., *Adv. Energy Mater.* **2018**, 8, 1802565.
